# Supplementary material for: Impact of plants on the diversity and activity of methylotrophs in soil
Source: PubMed Central journal article supplement (PMC7065363; doi:10.1186/s40168-020-00801-4), 2020-03-10
Supplement: 40168_2020_801_MOESM3_ESM.pdf [file 40168_2020_801_MOESM3_ESM.pdf]

**Additional File 2.** Relative abundance (%) of methylotrophic genera in 16S rRNA gene profile of soils.

| Genus                     | Putative/<br>Confirmed | Unplanted<br>soil | Pea<br>Rhizosphere | Wheat<br>Rhizosphere |
|---------------------------|------------------------|-------------------|--------------------|----------------------|
| <i>Hyphomicrobium</i>     | Confirmed              | 4.329             | 6.219              | 5.097                |
| <i>Verrucomicrobium</i>   | Confirmed              | 0.715             | 1.259              | 1.73                 |
| <i>Methylophilus</i>      | Confirmed              | 0.985             | 1.083              | 0.615                |
| <i>Beggiatoa</i>          | Confirmed              | 0.187             | 0.217              | 0.25                 |
| <i>Methylibium</i>        | Confirmed              | 0.232             | 0.184              | 0.237                |
| <i>Azosporillium</i>      | Confirmed              | 0.093             | 0.202              | 0.182                |
| <i>Methylobacterium</i>   | Confirmed              | 0.168             | 0.244              | 0.168                |
| <i>Variovorax</i>         | Confirmed              | 0.102             | 0.205              | 0.166                |
| <i>Burkholderia</i>       | Confirmed              | 0.11              | 0.103              | 0.136                |
| <i>Methylosinus</i>       | Confirmed              | 0.15              | 0.106              | 0.086                |
| <i>Roseomonas</i>         | Confirmed              | 0.04              | 0.091              | 0.076                |
| <i>Methylocella</i>       | Confirmed              | 0.076             | 0.088              | 0.068                |
| <i>Methylobacillus</i>    | Confirmed              | 0.09              | 0.088              | 0.047                |
| <i>Methylocapsa</i>       | Confirmed              | 0.062             | 0.048              | 0.044                |
| <i>Sphingomonas</i>       | Confirmed              | 0.025             | 0.072              | 0.031                |
| <i>Methylocystis</i>      | Confirmed              | 0.023             | 0.012              | 0.026                |
| <i>Methylotenera</i>      | Confirmed              | 0.023             | 0.021              | 0.016                |
| <i>Methyloceanibacter</i> | Confirmed              | 0.008             | 0.006              | 0.013                |
| <i>Starkeya</i>           | Confirmed              | 0.017             | 0.015              | 0.01                 |
| <i>Rhodopseudomonas</i>   | Confirmed              | 0.017             | 0.018              | 0.01                 |
| <i>Ancylobacter</i>       | Confirmed              | 0.008             | 0.009              | 0.01                 |
| <i>Xanthobacter</i>       | Confirmed              | 0                 | 0                  | 0.003                |
| <i>Methyloversatilis</i>  | Confirmed              | 0                 | 0                  | 0.003                |
| <i>Methyloligella</i>     | Confirmed              | 0.003             | 0                  | 0.003                |
| <i>Beijerinckia</i>       | Confirmed              | 0.003             | 0.003              | 0.003                |
| <i>Cupriavidus</i>        | Confirmed              | 0                 | 0.003              | 0                    |
| <i>Oharaeibacter</i>      | Confirmed              | 0                 | 0.003              | 0                    |

|                          |          |       |       |       |
|--------------------------|----------|-------|-------|-------|
| <i>Bradyrhizobium</i>    | Putative | 3.337 | 3.75  | 3.586 |
| <i>Flavobacterium</i>    | Putative | 3.502 | 0.764 | 0.796 |
| <i>Gemmatimonas</i>      | Putative | 0.469 | 0.42  | 0.425 |
| <i>Acidovorax</i>        | Putative | 0.529 | 0.465 | 0.237 |
| <i>Leptothrix</i>        | Putative | 0.074 | 0.072 | 0.073 |
| <i>Mesorhizobium</i>     | Putative | 0.045 | 0.048 | 0.055 |
| <i>Pseudomonas</i>       | Putative | 0.014 | 0.003 | 0.013 |
| <i>Verminephrobacter</i> | Putative | 0     | 0.012 | 0.003 |
| <i>Subaequorebacter</i>  | Putative | 0.003 | 0     | 0.003 |
| <i>Xanthomonas</i>       | Putative | 0.003 | 0.003 | 0     |
| <i>Meganema</i>          | Putative | 0.003 | 0.006 | 0     |

---

16S rRNA gene profiles were produced by sequencing of 16S rRNA gene amplicons produced from DNA extracted from pea and wheat plant rhizosphere soils and unplanted soil. Genera were then designated as either confirmed or putative methylotrophs.

Confirmed indicates a genus that contains species confirmed to be capable of methanol oxidation. Putative indicates a genus that contains species that possess methanol dehydrogenase genes.
