# Supplementary material for: Impact of plants on the diversity and activity of methylotrophs in soil
Source: PubMed Central journal article supplement (PMC7065363; doi:10.1186/s40168-020-00801-4), 2020-03-10
Supplement: 40168_2020_801_MOESM6_ESM.pdf [file 40168_2020_801_MOESM6_ESM.pdf]

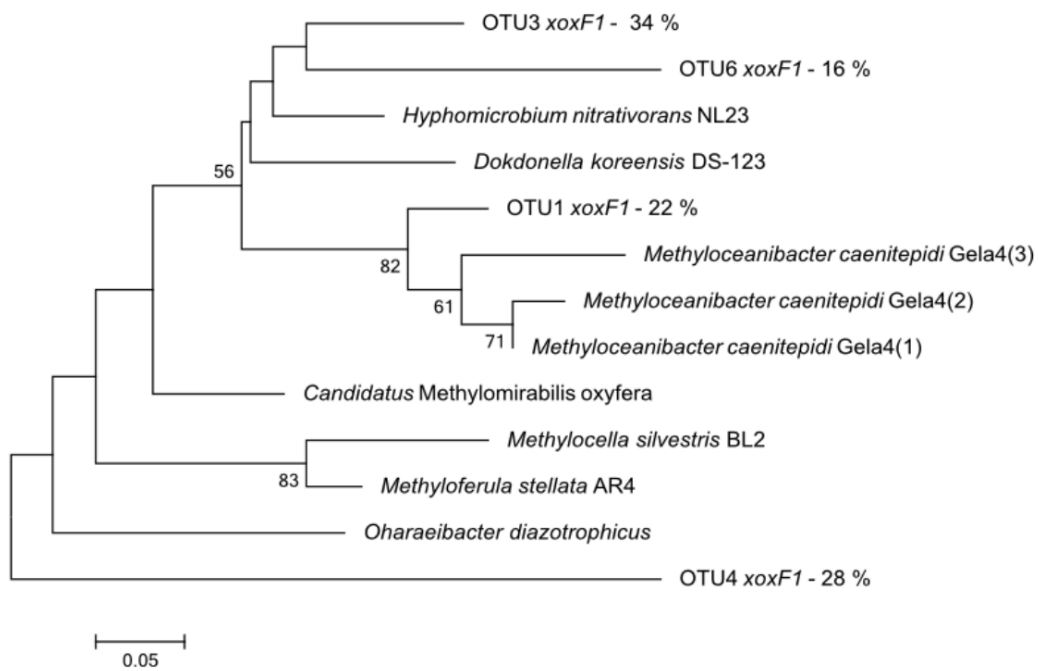

**Additional File 5. Phylogeny and relative abundance of *xoxF1* sequences retrieved from soil**

Phylogenetic tree of *xoxF1* sequences (OTU1 – OTU4) retrieved by PCR from DNA extracted from unplanted soil as revealed by amplicon sequencing. Reference gene sequences were selected from the NCBI nucleotide database. Only bootstrap values  $\geq 50\%$  (based on 500 replicates) are labelled at branch points. Alignments were produced at the amino acid level with the Muscle algorithm and phylogenetic trees were produced in Mega7 [70] using the neighbour-joining method. There were a total of 72 amino acid residues in the final dataset. Multiple *xoxF* gene copies in reference strains are numbered in parentheses.
