# Supplementary material for: Impact of plants on the diversity and activity of methylotrophs in soil
Source: PubMed Central journal article supplement (PMC7065363; doi:10.1186/s40168-020-00801-4), 2020-03-10
Supplement: 40168_2020_801_MOESM10_ESM.pdf [file 40168_2020_801_MOESM10_ESM.pdf]

**Additional File 9.** Diversity indices of the communities in the heavy fraction of methanol-enriched rhizosphere and unplanted soils

| Environment       | Timepoint | Sequence type | Community profile | Simpson index 1-D | Shannon index |
|-------------------|-----------|---------------|-------------------|-------------------|---------------|
| Unplanted         | T1        | Amplicon      | Labelled          | 0.04              | 0.11          |
| Unplanted         | T2        | Amplicon      | Labelled          | 0.62              | 1.31          |
| Unplanted         | T1        | Amplicon      | Total             | 0.93              | 2.85          |
| Unplanted         | T2        | Amplicon      | Total             | 0.79              | 2.20          |
| Unplanted         | T2        | Metagenome    | Total             | 0.85              | 2.03          |
| Pea rhizosphere   | T1        | Amplicon      | Labelled          | 0.75              | 1.47          |
| Pea rhizosphere   | T2        | Amplicon      | Labelled          | 0.72              | 1.68          |
| Pea rhizosphere   | T1        | Amplicon      | Total             | 0.28              | 0.88          |
| Pea rhizosphere   | T2        | Amplicon      | Total             | 0.72              | 0.54          |
| Pea rhizosphere   | T2        | Metagenome    | Total             | 0.81              | 2.19          |
| Wheat rhizosphere | T1        | Amplicon      | Labelled          | 0.48              | 0.93          |
| Wheat rhizosphere | T2        | Amplicon      | Labelled          | 0.01              | 0.03          |
| Wheat rhizosphere | T1        | Amplicon      | Total             | 0.68              | 1.71          |
| Wheat rhizosphere | T2        | Amplicon      | Total             | 0.81              | 2.39          |
| Wheat rhizosphere | T2        | Metagenome    | Total             | 0.83              | 2.36          |

Shannon diversity index and Simpson diversity index values were calculated from the genera detected in the amplicons and metagenomes produced from the heavy fraction of DNA extracted from the methanol enriched unplanted and pea and wheat rhizosphere soils. Diversity indexes were calculated for either all of the genera detected in an amplicon or the genera identified as labelled in the amplicon datasets.
