# Supplementary material for: Impact of plants on the diversity and activity of methylotrophs in soil
Source: PubMed Central journal article supplement (PMC7065363; doi:10.1186/s40168-020-00801-4), 2020-03-10
Supplement: 40168_2020_801_MOESM14_ESM.pdf [file 40168_2020_801_MOESM14_ESM.pdf]

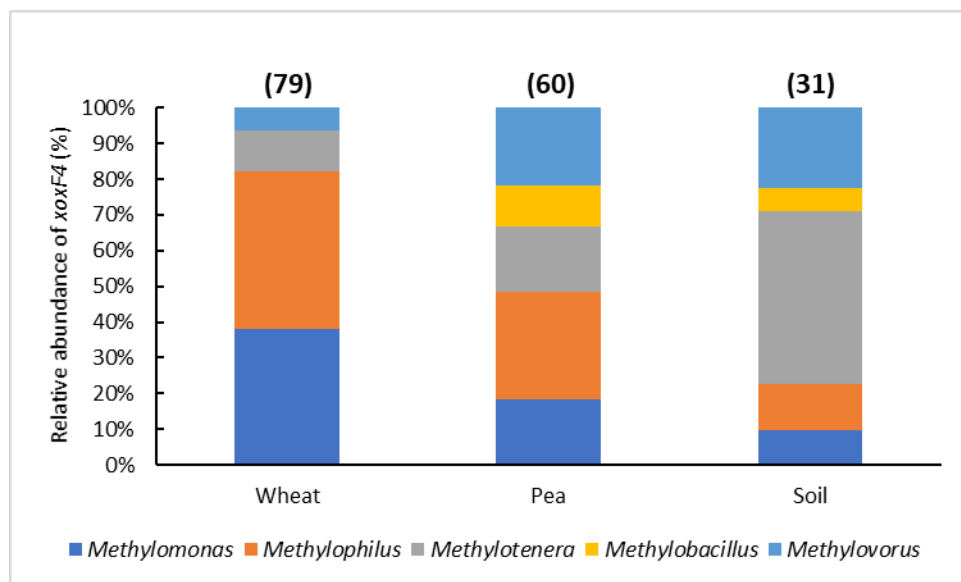

**Additional File 13. Diversity of *xoxF4* gene sequences retrieved from the heavy fractions of soils enriched with  $^{13}\text{C}$  methanol.**

Relative abundance of taxa based on *xoxF4* gene sequences retrieved from the assembled reads of the metagenomes produced from the heavy fractions of DNA extracted from Unplanted (Soil), pea rhizosphere (Pea) and wheat rhizosphere (Wheat) soil samples enriched with  $^{13}\text{C}$  methanol for 17 days (T2) in a DNA-SIP experiment. The number of contigs containing *xoxF4* sequences is displayed in brackets above the columns.
