# Supplementary material for: Impact of plants on the diversity and activity of methylotrophs in soil
Source: PubMed Central journal article supplement (PMC7065363; doi:10.1186/s40168-020-00801-4), 2020-03-10
Supplement: 40168_2020_801_MOESM27_ESM.pdf [file 40168_2020_801_MOESM27_ESM.pdf]

**Additional File 26. Relative abundance of genera detected as labelled in 16S rRNA gene profiles of the 1000 ppmv supplied test groups**

| Genera                   | Pea rhizosphere                |                                |                                |                                | Unplanted soil                 |                                |                                |                                |
|--------------------------|--------------------------------|--------------------------------|--------------------------------|--------------------------------|--------------------------------|--------------------------------|--------------------------------|--------------------------------|
|                          | <sup>13</sup> C heavy fraction | <sup>13</sup> C light fraction | <sup>12</sup> C heavy fraction | <sup>12</sup> C light fraction | <sup>13</sup> C heavy fraction | <sup>13</sup> C light fraction | <sup>12</sup> C heavy fraction | <sup>12</sup> C light fraction |
| <i>Phenyllobacterium</i> | 0.30                           | 0                              | 0.13                           | 0.07                           | 0.06                           | 0                              | 0                              | 0                              |
| <i>Micromonospora</i>    | 0.11                           | 0                              | 0                              | 0                              | 0.13                           | 0                              | 0                              | 0                              |
| <i>Ilumatobacter</i>     | 0.55                           | 0                              | 0.27                           | 0.11                           | 0.64                           | 0                              | 0.15                           | 0                              |
