# Supplementary material for: Impact of plants on the diversity and activity of methylotrophs in soil
Source: PubMed Central journal article supplement (PMC7065363; doi:10.1186/s40168-020-00801-4), 2020-03-10
Supplement: 40168_2020_801_MOESM28_ESM.pdf [file 40168_2020_801_MOESM28_ESM.pdf]

**Additional File 27. PCR primers used in this study**

| Primers     | Target gene                                    | Sequence                | Reference                      | Positive Control                          | Amplicon length (bp) | Annealing temp (°C) | Cycles |
|-------------|------------------------------------------------|-------------------------|--------------------------------|-------------------------------------------|----------------------|---------------------|--------|
| 27F MOD     | 16S rRNA gene                                  | AGRGTTTGATCMTGGCTCAG    |                                |                                           | 492                  | 60                  | 30     |
| 519R MODBIO |                                                | GTNTTACNGCGGCKGCTG      |                                |                                           |                      |                     |        |
| xoxF1F      | <i>xoxF1</i>                                   | TAYGCCGAYGGCAAGSTGST    | (Taubert <i>et al.</i> , 2015) | <i>Methylocella silvestris</i> BL2        | 600                  | 65- 55 Touchdown    | 30     |
| xoxF1R      |                                                | CCGTCRTARTCCCAYTGRTCGAA |                                |                                           |                      |                     |        |
| xoxF2F      | <i>xoxF2</i>                                   | GGCYTAYCAGATGACBCCNTGG  |                                | Confirmed <i>xoxF2</i> containing clone   | 620                  | 62- 52 Touchdown    | 30     |
| xoxF2R      |                                                | GCCTTRAACCAKCCRTCCA     |                                |                                           |                      |                     |        |
| xoxF3F      | <i>xoxF3</i>                                   | GGHGAGWCCATSACVATGGC    |                                | <i>Methylocella silvestris</i> BL2        | 1000                 | 62- 52 Touchdown    | 30     |
| xoxF3R      |                                                | TCCATSGTKCCGTAGAA       |                                |                                           |                      |                     |        |
| xoxF4F      | <i>xoxF4</i>                                   | TTYCCHAAYAACGINTAYGC    |                                | <i>Methylobacillus flagellatus</i> KT     | 660                  | 58- 48 Touchdown    | 30     |
| xoxF4R      |                                                | GGRTTRCCHGTHCCGTAGTA    |                                |                                           |                      |                     |        |
| xoxF5F      | <i>xoxF5</i>                                   | GAYGAVTGGGAYTWYGACGG    |                                | <i>Methylocella silvestris</i> BL2        | 370-390              | 62- 52 Touchdown    | 30     |
| xoxF5R      |                                                | GGYTCVTARTCCATRCA       |                                |                                           |                      |                     |        |
| 1003F       | <i>mxoF</i>                                    | GCGGCACCAACTGGGGCTGGT   | (Neufeld, <i>et al.</i> ,2007) | <i>Methylobacterium extorquens</i> AM1    | 552                  | 65- 55 Touchdown    | 30     |
| 1555R       |                                                | CATGAABGGCTCCARTCCAT    |                                |                                           |                      |                     |        |
| M13F        | Insert-flanking regions of pGEM®-T Easy Vector | GTAAAACGACGGCCAG        | Invitrogen                     |                                           | Insert size + 200bp  | 56                  | 35     |
| M13R        |                                                | CAGGAAACAGCTATGAC       |                                |                                           |                      |                     |        |
| mdh2F       | <i>mdh2</i>                                    | TGGCAGACCGCSTCGTTTCCA   | This work                      | <i>Methyloversatilis discipulorum</i> LF1 | 516                  | 52                  | 35     |
| mdh2R       |                                                | CAGTTGGTGCCGCCSAGGAA    |                                |                                           |                      |                     |        |
